# Supplementary material for: Properties of Plant Virus Protein Encoded by the 5′-Proximal Gene of Tetra-Cistron Movement Block
Source: MDPI journal article supplement (doi:10.3390/ijms241814144), 2023-09-15
Supplement: s1 [file s1]

**Supplementary Table S1.** Primers used in this study.

| Primer name | Sequence, 5' to 3'                             |
|-------------|------------------------------------------------|
| vDRB-pET-P  | GCGGATCCGGGCGGTAGTGAAGGTAGAGTTGCTAAACT         |
| vDRB-pET-M  | CGCTCGAGTTAGGTGTCTCTTTTAGATAAGAGTTC            |
| vDRB-ovl-P  | CTGACAACAGCCAAGGGTGGGTGTTGGGTGTCTCCTTTACG      |
| vDRB-ovl-M  | CACCCTTGGCTGTTGTCAGACCGCTCAAAATATTGCTACAATG    |
| vDRB-201-P1 | GGGCTAGCATGAGTAGGTCTTTTCTCGTTCTCGTTG           |
| vDRB-201-M  | CCCGTCGACTTAGGTGTCTCTTTTAGATAAGAGTT            |
| dsC3-P      | GAGAATTCTAATACGACTCACTATAGGGTGAAGGTGATGCTACATA |
| dsC3-M      | GAGAATTCTAATACGACTCACTATAGGGCAGATTGTGTCGACAG   |
| PVX-REP-P   | CATTGTATGCGACCTTAGTTCTC                        |
| PVX-REP-M   | CGTGTAAATTGAGATGTCCGAGAA                       |
| F-box-F     | GGCACTCACAAACGTCTATTTTC                        |
| F-box-R     | ACCTGGGAGGCATCCTGCTTAT                         |
